# Supplementary material for: Sepsisassoziierte Todesfälle in Deutschland: Charakteristika und regionale Variation
Source: Springer Nature journal article supplement (doi:10.1007/s00103-021-03427-5), 2021-11-08
Supplement: MOESM1 [file 19844802]

Onlinematerial zum Beitrag:

## **Sepsisassoziierte Todesfälle in Deutschland: Charakteristika und regionale Variation**

Carolin Fleischmann-Struzek<sup>1,2</sup>, Norman Rose<sup>1,2</sup>, Konrad Reinhart<sup>3</sup>

<sup>1</sup> Institut für Infektionsmedizin und Krankenhaushygiene, Universitätsklinikum Jena, Jena, Deutschland

<sup>2</sup> Center for Sepsis Control and Care, Universitätsklinikum Jena, Jena, Deutschland

<sup>3</sup> Klinik für Anästhesiologie m. S. operative Intensivmedizin, Charité Universitätsmedizin Berlin, Berlin, Deutschland

### **Korrespondenzadresse:**

Dr. med. Carolin Fleischmann-Struzek  
Institut für Infektionsmedizin und Krankenhaushygiene  
Universitätsklinikum Jena  
Am Klinikum 1  
07740 Jena, Deutschland  
E-Mail: carolin.fleischmann@med.uni-jena.de

Inhalt:

- **Operationalisierungen basierend auf ICD-10-GM Codes und OPS-Codes**
- **Tabelle S1:** Fallzahlen, Inzidenz (roh, altersstandardisiert), Todesfälle und Mortalität (roh, altersstandardisiert) der explizit identifizierten Sepsis nach Bundesland in Deutschland in 2016

## **Operationalisierungen basierend auf ICD-10-GM Codes und OPS-Codes**

### Infektfokus

Respiratorische Infektionen: J01, J02, J03, J04, J06, J05, J09, J10, J11, J12, J13, J14, J15, J16, J17, J18, J20, J21, J22, J44.0, J44.1, J86, J85, A15, A16, U69.00, A36, A37, B38, B39

Abdominelle Infektionen: A00, A01, A02, A03, A04, A05, A06, A07, A08, A09, K35, K37, K36, K57.02, K57.03, K57.12, K57.13, K57.22, K57.23, K57.32, K57.33, K57.42, K57.43, K57.52, K57.53, K57.82, K57.83, K57.92, K57.93, K61, K65, K67, K63.0, K63.1, K75.0, K75.1, K81.0, K77.0, U69.40!

Wund-/Weichteilinfektionen: A46, B47, L03, L04, L08, L05, B00, B07, B08, B09, H05.0, H60.2, H70.0, J36, J39.0, J39.1, L02

Urogenitalinfektionen: N10, N15.1, N15.9, N34, N30, N39.0, N41, N45, N48.2, N49, N70, N71, N72, N73, N74, N75, N76, N77, N61, N98.0, A59, A55, A56

ZNS-Infektionen: A39, G00, G01, G02, G03, G04, G05\*, G06, G07\*, G08, A17+, A81, A83, A84, A85, A86, A87, A88, A89

Kardiovaskuläre Infektionen: I32, I33, I39, I40, I41, I80, I38, I98.1

Fremdkörper-assoziierte Infektionen: T82.6, T82.7, T83.5, T83.6, T84.5, T84.6, T84.7, T85.7

Schwangerschafts-assoziierte Infektionen: O75.3, O85, O03.0, O03.5, O04.0, O04.5, O05.0, O05.5, O06.0, O06.5, O07.0, O07.5, O08.0, O86, O23, O41.1, O88.3, O91, O98

Implizite Sepsis: o.g. Infektionen nach Fokus oder unspezifische Infektion: A18, A19, A20, A21, A22, A23, A24, A25, A26, A27, A28, A32, A38, A42, A43, A44, A48, A49, A54, A690, A691, A692, A698, A699, A97, B37, B40, B41, B42, B43, B44, B45, B46, B48, B49, B50, B51, B52, B53, B54, M00, M01, M86, T802, T814, T880, A90, A91, A50, A65, A74, A75, A77, A78, A79, A80, A92, A93, A94, A95, A96, A98, A99, B01, B02, B03, B04, B05, B06, B25, B26, B27, B33, B34, B55, B58, B60, B64, B67, B95, B96, B97, B98, B99

und Vorhandensein einer Organdysfunktion: I959, R578, R579, J96, J80, J984, R060, R068, F05, G931, G934, R40, N17, N19, E872, D65, D688, D689, D695, D696, K720, K727, K729, K762, K763, R651, R572

Neonatale Sepsis: P36

Influenza-Infektion (laborbestätigt): J09, J10

Septischer Schock: R57.2

Chirurgischer Eingriff: Entsprechend Variable DRG Statistik

Intensivmedizinische Komplexbehandlung: 8-980, 8-98d, 8-98f

Mechanische Beatmung: Entsprechend Variable DRG Statistik

Liegedauer: Entsprechend Variable DRG Statistik

Tabelle S1: Fallzahlen, Inzidenz (roh, altersstandardisiert), Todesfälle und Mortalität (roh, altersstandardisiert) der explizit identifizierten Sepsis nach Bundesland in Deutschland in 2016

\*pro 100,000 Einwohner

| <b>Bundesland</b>      | <b>Fälle</b> | <b>Todesfälle</b> | <b>Inzidenz*</b> | <b>AS Inzidenz*</b> | <b>Letalität</b> | <b>Mortalität*</b> | <b>AS Mortalität*</b> |
|------------------------|--------------|-------------------|------------------|---------------------|------------------|--------------------|-----------------------|
| Baden-Württemberg      | 15558        | 6289              | 142              | 149                 | 40,4             | 57                 | 61                    |
| Bayern                 | 26983        | 9309              | 209              | 218                 | 34,5             | 72                 | 76                    |
| Berlin                 | 9266         | 3541              | 259              | 285                 | 38,2             | 99                 | 110                   |
| Brandenburg            | 4498         | 1935              | 180              | 161                 | 43,0             | 78                 | 69                    |
| Bremen                 | 1385         | 631               | 204              | 208                 | 45,6             | 93                 | 95                    |
| Hamburg                | 3830         | 1630              | 212              | 238                 | 42,6             | 90                 | 103                   |
| Hessen                 | 8334         | 3471              | 134              | 139                 | 41,6             | 56                 | 58                    |
| Mecklenburg-Vorpommern | 4556         | 1503              | 283              | 256                 | 33,0             | 93                 | 83                    |
| Niedersachsen          | 12470        | 5209              | 157              | 155                 | 41,8             | 66                 | 65                    |
| Nordrhein-Westfalen    | 30479        | 13359             | 170              | 173                 | 43,8             | 75                 | 76                    |
| Rheinland-Pfalz        | 5537         | 2238              | 136              | 135                 | 40,4             | 55                 | 55                    |
| Saarland               | 2176         | 971               | 218              | 202                 | 44,6             | 97                 | 89                    |
| Sachsen                | 8628         | 3359              | 211              | 185                 | 38,9             | 82                 | 71                    |
| Sachsen-Anhalt         | 3794         | 1517              | 170              | 145                 | 40,0             | 68                 | 57                    |
| Schleswig-Holstein     | 4096         | 1680              | 142              | 137                 | 41,0             | 58                 | 56                    |
| Thüringen              | 5395         | 2047              | 250              | 220                 | 37,9             | 95                 | 83                    |

Abkürzungen: AS = altersstandardisierte
